# Supplementary material for: A Fraction of CD8+ T Cells from Colorectal Liver Metastases Preferentially Repopulate Autologous Patient-Derived Xenograft Tumors as Tissue-Resident Memory T Cells
Source: MDPI journal article supplement (doi:10.3390/cancers14122882), 2022-06-10
Supplement: s1 [file s1]

## Supplementary Materials

**Table S1.** Characteristics of colorectal cancer patients with liver metastases.

|                        |                                      | <b>Females</b> | <b>Males</b> |
|------------------------|--------------------------------------|----------------|--------------|
|                        | n (15)                               | 5              | 10           |
|                        | Age range                            | 58–71          | 44–78        |
|                        | Age median                           | 67             | 62           |
|                        | Synchronous tumor                    | 4              | 7            |
|                        | Metachronous tumor                   | 1              | 3            |
| Primary tumor location | Right colon                          | 0              | 2            |
|                        | Left colon                           | 5              | 3            |
|                        | Rectum                               | 0              | 5            |
|                        | CEA (ng/mL)                          | 1–25           | 1–8          |
|                        | Median CEA (ng/mL)                   | 7.5            | 8.8          |
|                        | Untreated                            | 1              | 7            |
| Neoadjuvant            | Capecitabine/Oxaliplatin             | 0              | 2            |
|                        | Leucovorin/Fluorouracil/ Oxaliplatin | 4              | 1            |

**Table S2.** Fluorescence-conjugated antibodies for flow cytometry.

| <b>Antibody</b>    | <b>Clone</b> | <b>Manufacturer</b> |
|--------------------|--------------|---------------------|
| CD3                | UCHT1        | BD Biosciences      |
| CD4                | OKT4         | Biolegend           |
| CD8                | RPA-T8       | BD Biosciences      |
| CD14               | M5E2         | Biolegend           |
| CD16               | 3G8          | Biolegend           |
| CD19               | SJ25C1       | BD Biosciences      |
| CD25               | 2A3          | BD Biosciences      |
| CD39               | A1           | Biolegend           |
| CD56               | HCD56        | Biolegend           |
| CD80               | L307.4       | BD Biosciences      |
| CD1c               | L161         | Biolegend           |
| CD11c              | B-ly6        | BD Biosciences      |
| CD45               | HI30         | BD Biosciences      |
| CD45RO             | UCHL1        | BD Biosciences      |
| CD103              | Ber-ACT8     | BD Biosciences      |
| CD123              | 9F5          | BD Biosciences      |
| CD127              | A019D5       | Biolegend           |
| CD141              | 1A4          | BD Biosciences      |
| CD163              | RM3/1        | Biolegend           |
| HLA-ABC            | G46-2.6      | BD Biosciences      |
| HLA-DR             | G46-6        | BD Biosciences      |
| TCR $\gamma\delta$ | B1           | BD Biosciences      |
| TCR V $\alpha$ 7.2 | 3C10         | Biolegend           |
| PD-1               | EH12.1       | BD Biosciences      |
| LAG-3              | 11C3C65      | Biolegend           |
| TIM-3              | 7D3          | BD Biosciences      |
| PD-L1              | 29E.2A3      | Biolegend           |
| EpCAM              | 9C4          | Biolegend           |
| E-Cadherin         | 67A4         | Biolegend           |
| IFN- $\gamma$      | B27          | BD Biosciences      |

**Table S3.** Reagents for in situ staining of PDX tumor sections

| <b>Primary antibodies</b>  | <b>Clone</b>             | <b>Vendor</b>                |
|----------------------------|--------------------------|------------------------------|
| CD3                        | Polyclonal               | Dako, Glostrup, Denmark      |
| CD8                        | SP16                     | Invitrogen, Waltham, MA, USA |
| CD103                      | EPR466-(2)               | Abcam, Cambridge, UK         |
| Granzyme B                 | EPR22645-206             | Abcam                        |
| Ki67                       | MIB-1                    | Dako                         |
| Pan-Cytokeratin            | KRT/1877R                | Abcam                        |
| <b>HRP substrates</b>      | <b>Marker visualized</b> | <b>Vendor</b>                |
| CF430                      | CD3                      | Biotium, Fremont, CA, USA    |
| CF488                      | Ki67                     | Biotium                      |
| CF594                      | CD8                      | Biotium                      |
| TSA-DIG & Opal Polaris 780 | Granzyme B               | Akoya, Marlborough, MA, USA  |
| TSA Cyanine 3              | CD103                    | Akoya                        |
| TSA Cyanine 5              | Pan-Cytokeratin          | Akoya                        |

Horseradish peroxidase (HRP)-conjugated secondary antibodies: Envision FLEX/HRP (Dako), or Opal Polymer HRP Ms+Rb (Akoya). Cell nuclei were stained with DAPI (Sigma, St. Louis, MO, USA).

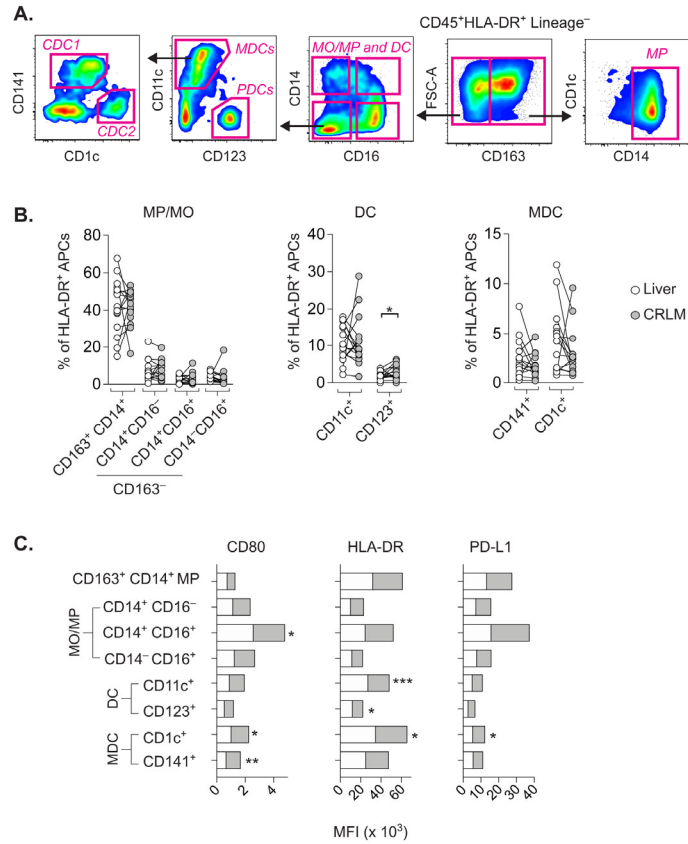

**Figure S1.** Characterization of APCs in CRLM and adjacent liver tissue. **(A)** Gating strategy of APC subsets, as shown with single cell suspension of CRLM. Viable, HLA-DR<sup>+</sup> and lineage (CD3, CD19, CD56)<sup>-</sup> cells of CD45<sup>+</sup> leukocytes were separated into CD163<sup>-</sup> and CD163<sup>+</sup> fractions. The CD14<sup>+</sup> macrophages (MPs) were gated from CD163<sup>+</sup> cells. The CD163<sup>-</sup> fraction contained subsets of monocytes (MOs) and/or MPs that were defined by their CD14 and CD16 expression. The CD163<sup>-</sup>CD14<sup>-</sup>CD16<sup>-</sup> dendritic cells (DCs) comprised CD123<sup>+</sup> plasmacytoid DCs (PDCs) and CD11c<sup>+</sup> myeloid DCs (MDCs). The MDCs were further separated into subsets known as, CD141<sup>+</sup> CDC1 and CD1c<sup>+</sup> CDC2. **(B)** Frequency of indicated APC subsets among total HLA-DR<sup>+</sup> APCs in CRLM vs. adjacent liver tissue. **(C)** Stacked bars show the proportions of MFI on the staining of CD80, HLA-DR and PD-L1 on APC subsets in CRLM and liver, respectively. (\* $p < 0.05$ , \*\* $p < 0.01$ , \*\*\* $p < 0.001$ , Wilcoxon test).

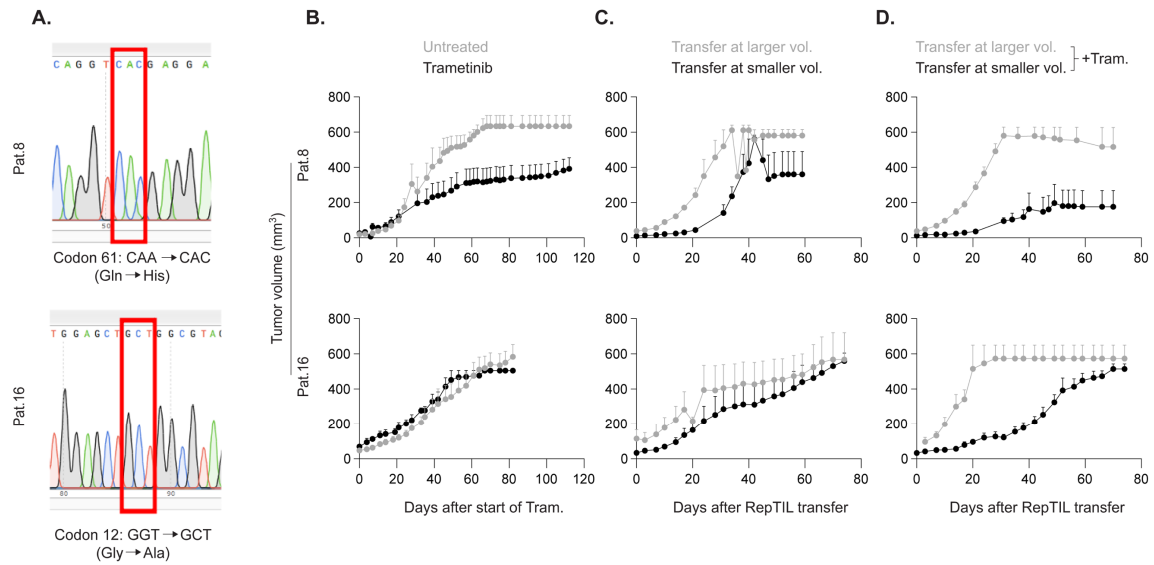

**Figure S2.** Modest improvement in growth control of tumor implants of limited size by autologous RepTILs in trametinib-treated PDX mice. The PDX mice with subcutaneous tumor implants derived from CRLM of patient 8, or patient 16, were separated into groups that received transfer of RepTILs, or not. Both groups were further divided into groups that received trametinib, or left untreated. **(A)** Sanger sequencing of mutations in the *KRAS* gene in CRLM samples. Red boxes show altered nucleotide sequence in codon 61 (patient 8) and codon 12 (patient 16), respectively. **(B)** Cumulative volumes of tumors derived from patient 8 or 16, in untreated and trametinib-treated PDX mice that did not receive transfer of RepTILs. **(C)** Cumulative tumor volumes in untreated PDX mice that received RepTIL transfer when tumor implants were above or below a specific volume (20 mm<sup>3</sup> and 50 mm<sup>3</sup> for patient 8 and 16, respectively). **(D)** Cumulative tumor volumes in PDX mice that received RepTIL transfer at the same time as PDX mice in C, and then treated with trametinib around 3 weeks later.

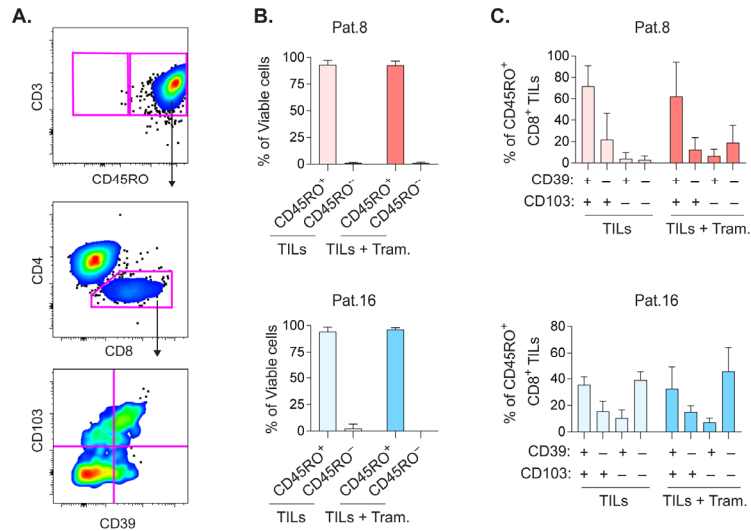

**Figure S3.** Memory CD8 T cells in tumor implants contain CD103<sup>+</sup> T<sub>RM</sub> cells and CD103<sup>-</sup> TILs. **(A)** Gating strategy of CD45RO<sup>+</sup> memory CD8 T cell subsets defined by CD103 and CD39 expression. **(B)** Compiled data from 3 PDX mice/patient, with regards to percentage of CD3<sup>+</sup>CD45RO<sup>+</sup> memory T cells among live cells in the tumor implants of PDX mice representing patient 8 or 16, which received RepTILs with or without subsequent trametinib treatment. **(C)** Frequency of CD103<sup>+</sup>CD39<sup>+</sup> T<sub>RM</sub> cells, CD103<sup>+</sup>CD39<sup>-</sup> T<sub>RM</sub> cells, CD103<sup>-</sup>CD39<sup>+</sup> T cells, or CD103<sup>-</sup>CD39<sup>-</sup> T cells within CD45RO<sup>+</sup>CD8<sup>+</sup> memory T cells in tumor explants of indicated groups. Bars show the mean with SD.

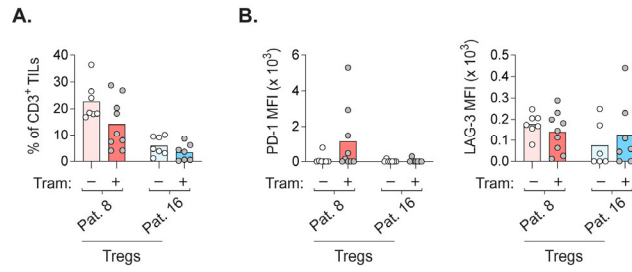

**Figure S4.** Frequency of Tregs in tumor implants of PDX mice. The CD4<sup>+</sup>CD127<sup>dim</sup>/–CD25<sup>+</sup> Tregs were identified using the same gating strategy as shown in Figure 1. **(A)** Frequency of in tumor implants from the indicated groups of PDX mice representing patient 8 and 16, respectively. **(B)** Expression of PD-1 and LAG-3 by the Tregs. Bars show the mean.

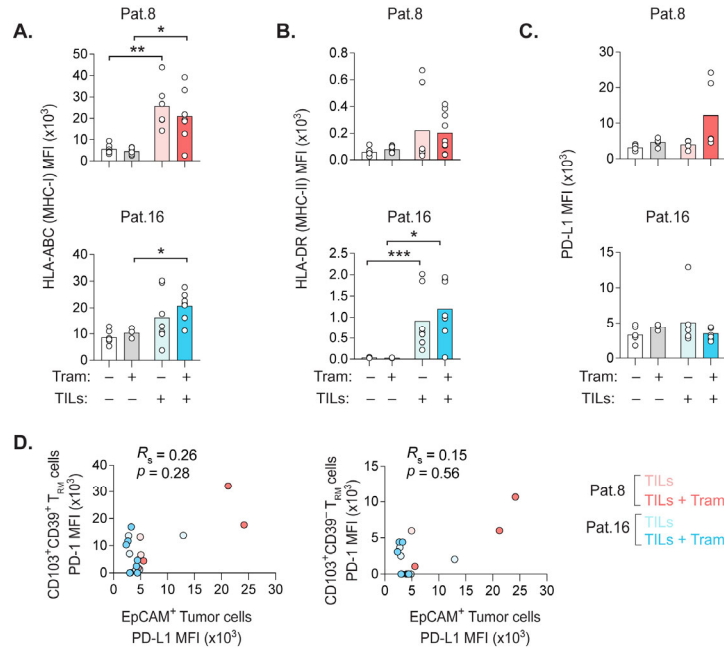

**Figure S5.** Characterization of EpCAM<sup>+</sup> cells of tumor implants. The PDX mice with tumor implants from patients 8 or 16, were treated as described in Figure S2. The MFI on staining of HLA-ABC (MHC-I) (A), HLA-DR (MHC-II) (B), and PD-L1 (C) on EpCAM<sup>+</sup> tumor epithelial cells from tumor implants of the specified groups. (D) Non-parametric Spearman correlation analyses of PD-1 MFI of CD103<sup>+</sup>CD39<sup>+</sup>CD8<sup>+</sup> T<sub>RM</sub> cells, or CD103<sup>+</sup>CD39<sup>-</sup>CD8<sup>+</sup> T<sub>RM</sub> cells vs. PD-L1 MFI of EpCAM<sup>+</sup> tumor cells. Bars show the mean.
